# Supplementary material
Source: JCI journal article supplement (doi:10.1172/jci167032)

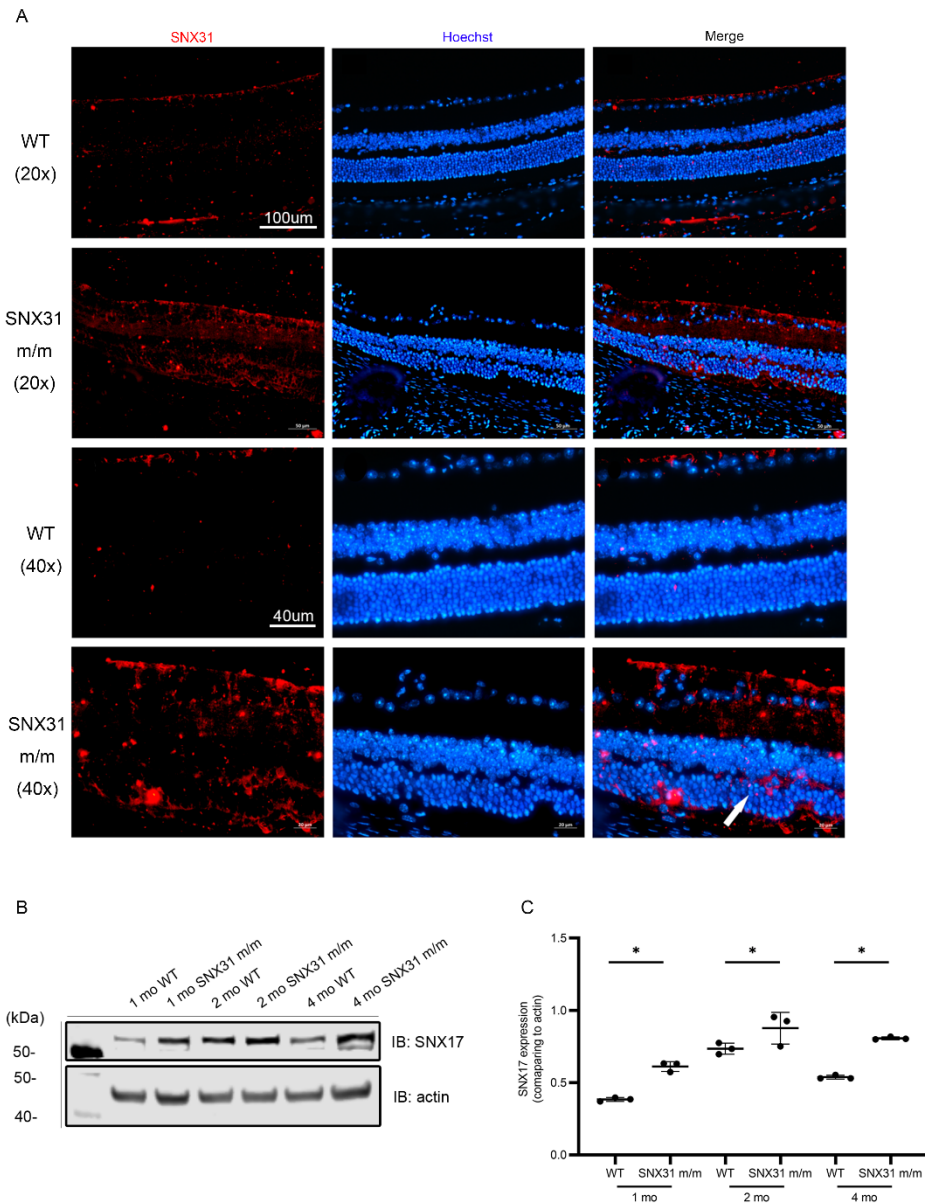

**Figure S1.** Immunofluorescence staining of SNX17 in retinas of WT and SNX31m/m mice. (A) The immunofluorescence results of SNX17 in WT and SNX31m/m mice. Increased expression of SNX17 in the outer plexiform layer is seen at the white arrow. Red: SNX17; blue: Hoechst-stained nuclei. (B) The protein expression of SNX17 was higher in SNX31m/m mice at 1, 2 and 4 months of age than in wild-type mice. Statistical analysis was performed using the unpaired parametric t test. Data are shown as mean  $\pm$  SEM. \* $P < 0.05$ .

**Full unedited gel for Figure 2B:**

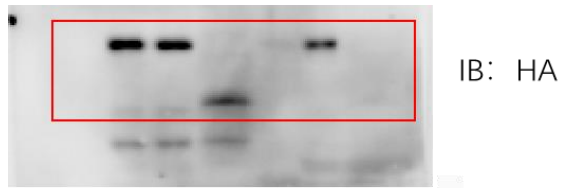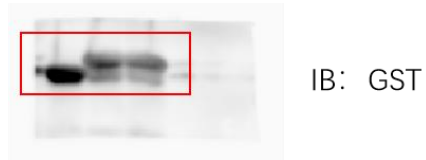

**Full unedited gel for Figure 2C:**

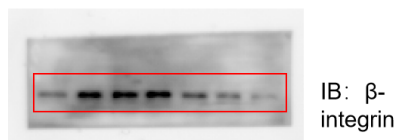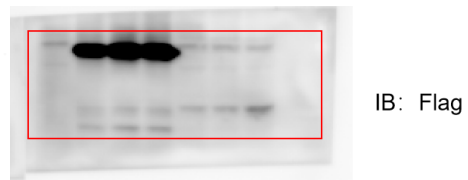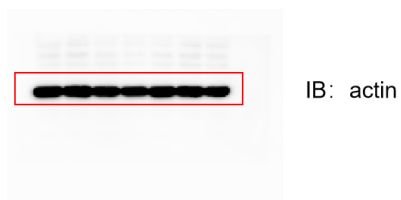

**Full unedited gel for Figure 3C:**

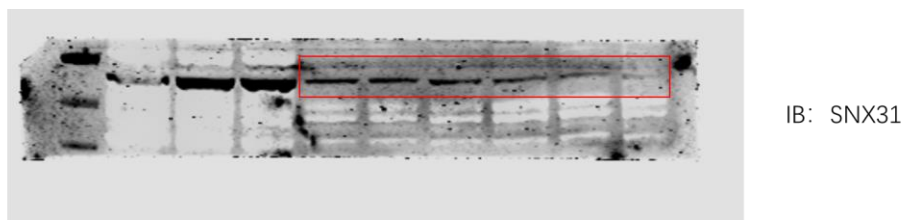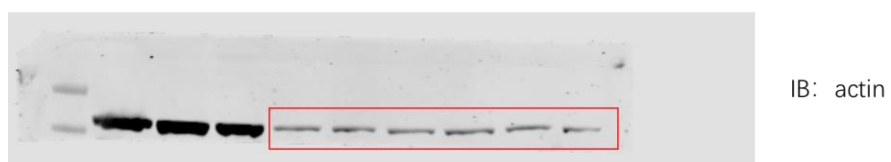

Full unedited gel for Figure 5E:

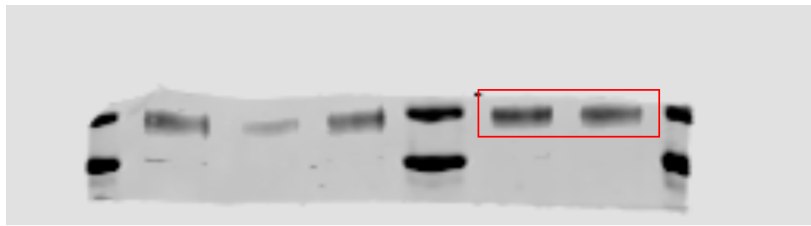

IB: integrin  $\beta$ 1

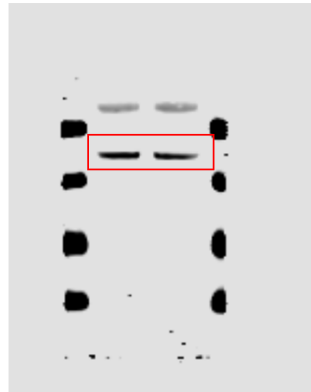

IB: actin

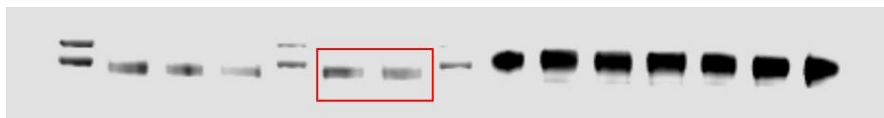

IB: integrin  $\beta$ 1

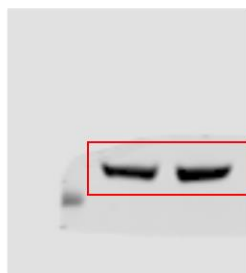

IB: actin

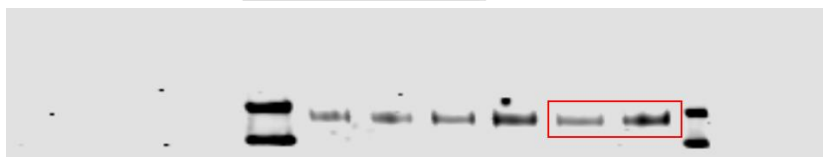

IB: integrin  $\beta$ 1

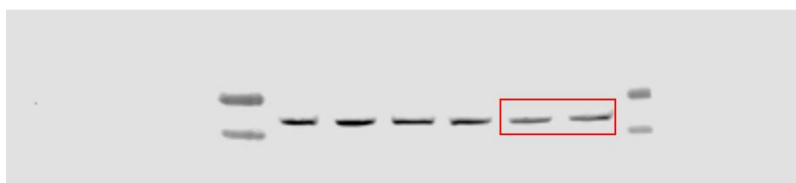

IB: actin

**Full unedited gel for Figure 5F:**

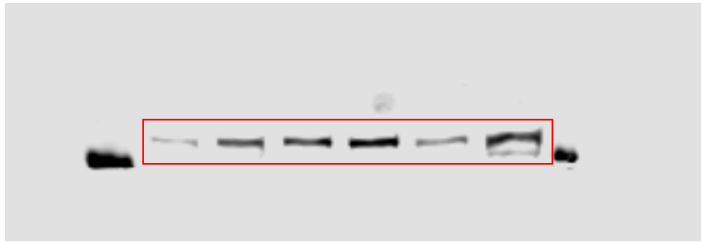

IB: SNX17

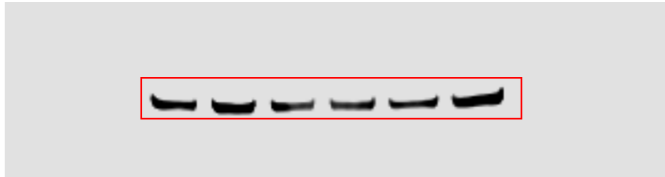

IB: actin

**Full unedited gel for Figure 6A:**

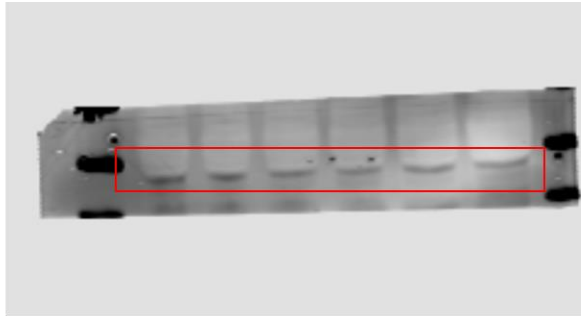

IB:  $\beta$ -catenin

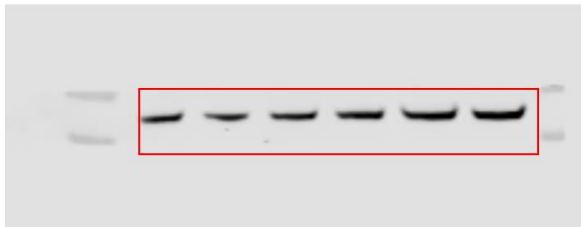

IB: actin

**Full unedited gel for Figure 6B:**

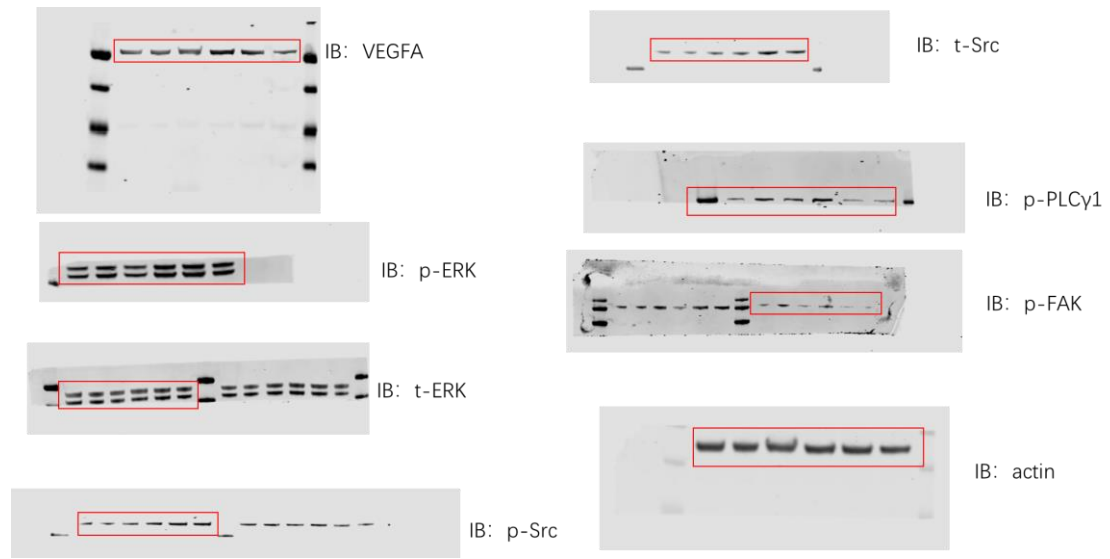

**Full unedited gel for Figure 7B:**

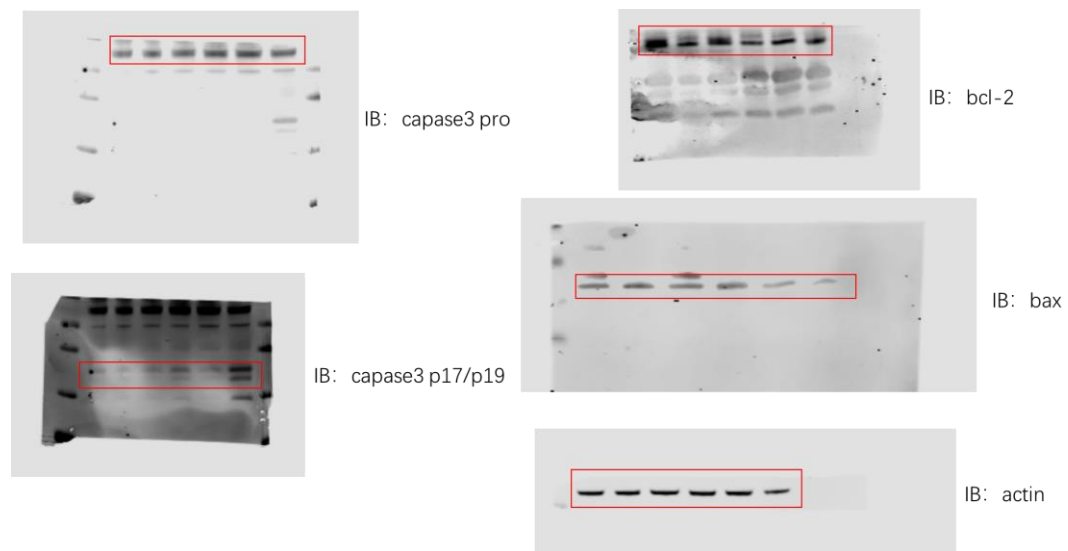

Supplement: sd1 [file 1]
